# Supplementary material for: The ultra-rapid synthesis of 2D graphitic carbon nitride nanosheets via direct microwave heating for field emission
Source: Royal Society of Chemistry journal article supplement (doi:10.1039/c5cc10258h), 2016-01-01
Supplement: c5cc10258h1.pdf [file c5cc10258h1.pdf]

Electronic Supplementary Material (ESI) for ChemComm.  
This journal is © The Royal Society of Chemistry 2015

---

## Electronic Supplementary Information

# **Ultra-rapid synthesis of 2D graphitic carbon nitride nanosheets via direct microwave heating for field emission**

Yongzhi Yu,<sup>a</sup> Qing Zhou<sup>a</sup> and Jigang Wang<sup>\*ab</sup>

<sup>a</sup> Jiangsu Key Laboratory of Advanced Metallic Materials, School of Materials Science and Engineering, Southeast University, Nanjing, 211189, P. R. China.

Tel: +86-29-33756203; Fax: +86-29-33755049; E-mail: wangjigang@seu.edu.cn

<sup>b</sup> Xizang Key Laboratory of Optical Information Processing and Visualization Technology, School of Information Engineering, Xizang Minzu University, Xianyang, 712082, P. R. China

## **1. Experimental section**

### 1.1 Preparation of 2D g-C<sub>3</sub>N<sub>4</sub> nanosheets

The synthesis of 2D g-C<sub>3</sub>N<sub>4</sub> nanosheets was performed in a multimode microwave vacuum sintering furnace (Jiequan Microwave Co., China). By adjusting the irradiation power, which is in the range of 0~10 kW, the temperature of raw materials can be ultra-rapid heated to a few hundred degrees centigrade in tens of seconds. The temperatures were measured by an optical pyrometer (Reytek) on the top of insulation glass.

The 2D g-C<sub>3</sub>N<sub>4</sub> nanosheets were successfully prepared via direct microwave heating of melamine and carbon fiber. In a typical synthesis, 10 g melamine and 0.5 g carbon fiber were taken into the ceramic crucible. The crucible together with the

---

specimens was placed at the center of a commercial microwave vacuum sintering furnace, the furnace cavity was then evacuated to below  $1.5 \times 10^4$  Pa by a water circulating pump. After the microwave heating with irradiation power of 5.0 kW for 5 min, the light yellow 2D g-C<sub>3</sub>N<sub>4</sub> nanosheets were obtained. During the microwave irradiation process, the highest temperature detected by optical pyrometer was approximately 574 °C.

## 1.2 Characterizations

Powder X-ray diffraction (XRD) patterns were recorded with a X'TRA X-ray diffractometer with Cu Ka radiation ( $\lambda = 1.5418$  Å). The accelerating voltage and the emission current were 40 kV and 35 mA, respectively. Data were collected over the  $2\theta$  range of 5-80°, with a step width of 0.02° and a scan rate of 10 °/min. Fourier transformed infrared (FT-IR) spectra were obtained by a Nicolet 870 FT-IR spectrometer. The sample discs were prepared by the KBr pellet technique (1% of sample in dried KBr). Field emission scanning electron microscopy (FE-SEM) with the type of XL FECSFEG-SIRION (FEI Ltd., Netherlands) was applied to investigate the morphological features of the obtained g-C<sub>3</sub>N<sub>4</sub>. Before investigation, the samples were placed on a sample holder by using conductive adhesive and then coated with a thin layer of platinum. Transmission electron microscopy (TEM) investigation was performed with a FEI Tecnai T20 microscopy (FEI, Eindhoven, Netherlands) operated at 200 kV acceleration voltages using a LaB6 filament. The images were recorded using a Megaview III CCD camera. Atomic force microscopy (AFM) measurement was carried out with a type of Dimension ICON (Veeco, USA). The UV-vis spectra were collected with a Cary 5000 UV-vis diffuse reflection

---

spectrophotometer. Photoluminescence (PL) spectrum was measured using a Hitach F-7000 typed fluorescence spectrophotometer at room temperature, with the excitation light of 350 nm from xenon lamp. The specific surface area was measured by using an Autosorb-IQ2 adsorption instrument (Quantachrome Instruments, USA) and calculated by the Brunauer-Emmett-Teller (BET) equation. The field emission properties of product were measured in a vacuum chamber at a pressure of  $\sim 6.0 \times 10^{-5}$  Pa. The current-voltage (I-V) curves were tested on a self-made measurement system. The distance between the cathode and the anode was fixed at 2 mm.

### 1.3 Field emission performance measurement

All the chemicals were used without any further purification. In brief, 0.2 g of Ethyl cellulose (AR) was gradually taken into 20 mL of terpinol (AR) at 90 °C with magnetic stirring for 1 h to completely dissolve. Subsequently, 20 mg of 2D g-C<sub>3</sub>N<sub>4</sub> nanosheets were added into the mixed solution, and the mixture was still magnetically stirred for 2 h to well disperse. After cool down, the mixture was coated onto a copper substrate as the cathode. The copper substrates were cleaned ultrasonically in ethanol and acetone consecutively before coating. The field emission characteristics of the 2D g-C<sub>3</sub>N<sub>4</sub> nanosheets coating were carried out in a vacuum chamber at a pressure of  $\sim 6.0 \times 10^{-5}$  Pa.

---

## 2. Results and discussion

### 2.1 Results of characterization

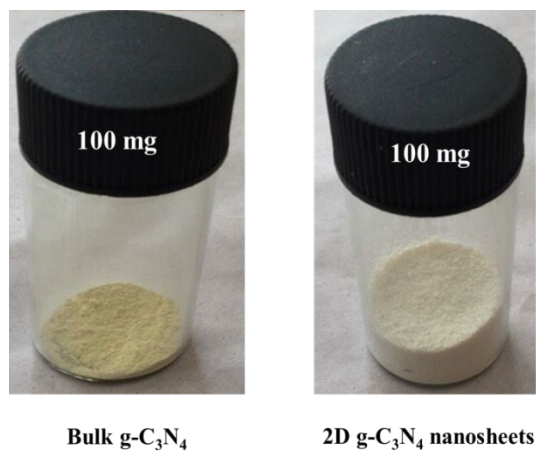

**Fig. S1** The digital photographs of bulk g-C<sub>3</sub>N<sub>4</sub> and 2D g-C<sub>3</sub>N<sub>4</sub> nanosheets.

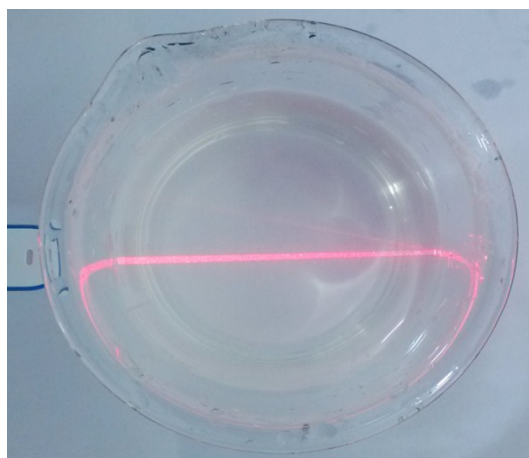

**Fig. S2** Tyndall effect exhibition of 2D g-C<sub>3</sub>N<sub>4</sub> nanosheets solution irradiated with red laser light.

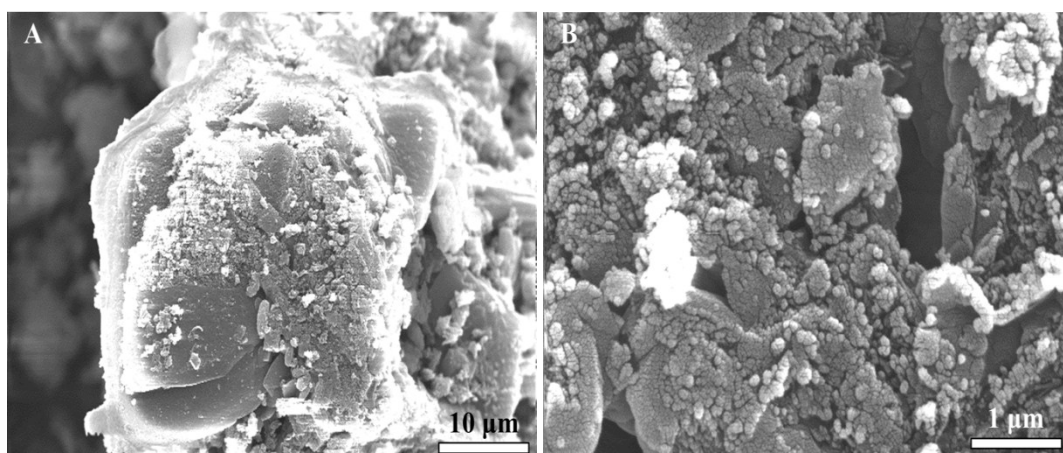

**Fig. S3** SEM images of bulk g-C<sub>3</sub>N<sub>4</sub> with Low- (A) and high- (B) magnification ratio.

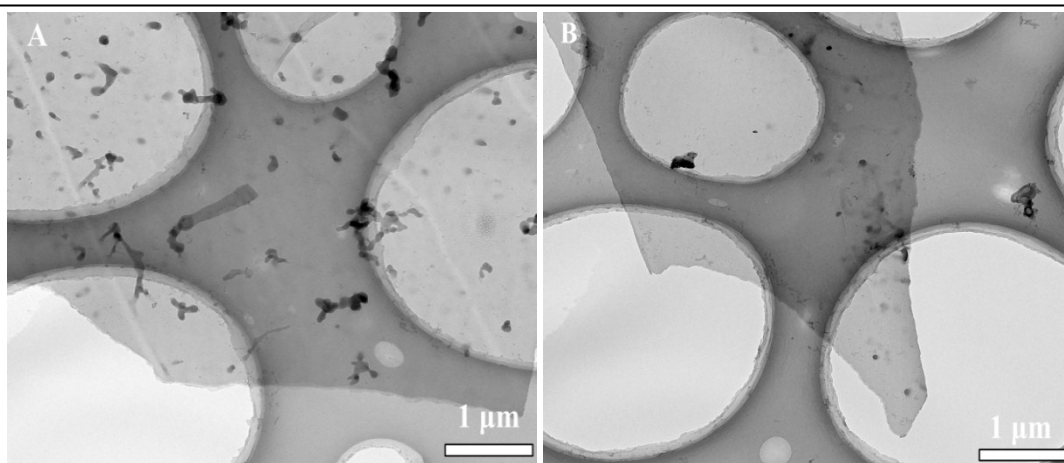

**Fig. S4** TEM images of 2D g-C<sub>3</sub>N<sub>4</sub> nanosheets.

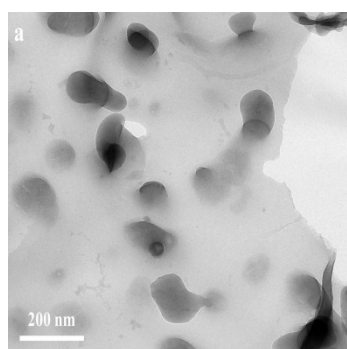

**Fig. S5-a** The initial structure of pyramid-like bumps (black spots shown in Fig. S4) on the surface of 2D g-C<sub>3</sub>N<sub>4</sub> nanosheets synthesized with irradiation power of 5.0 kW for 5 min.

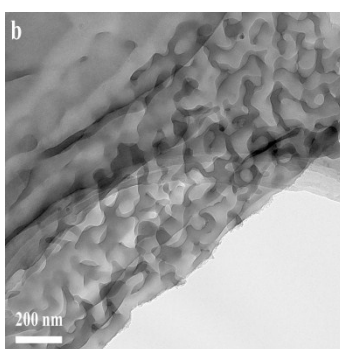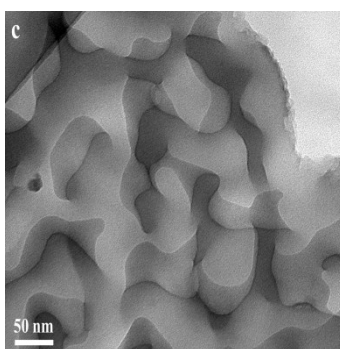

**Fig. S5-b and S5-c** The subsequent growth of nanosheets synthesized

these bumps on the surface of 2D g-C<sub>3</sub>N<sub>4</sub>

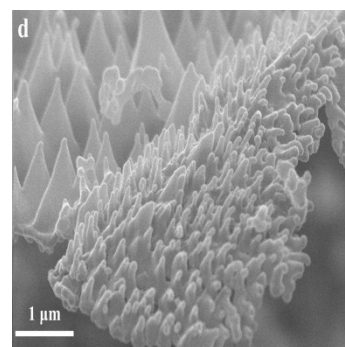

**Fig. S5-d** The array of the pyramid-like bumps on the surface of 2D g-C<sub>3</sub>N<sub>4</sub> nanosheets synthesized with irradiation power of 5.0 kW for 7 min. with irradiation power of 5.0 kW for 9 min.

**Fig. S5** The formation of the array of pyramid-like bumps on the 2D-g-C<sub>3</sub>N<sub>4</sub> nanosheets in the different reaction time

---

## 2.2 The formation mechanism of 2D-g-C<sub>3</sub>N<sub>4</sub> nanosheets

Under the high-energy microwave irradiation, plasma and electric arc might be produced, resulting in the formation of carbon atoms or carbon atom clusters. During the polycondensation reaction of melamine, these carbon atoms characterized with high reaction active also participate in the formation of g-C<sub>3</sub>N<sub>4</sub> covering the formation of C–N bonds and the primary nucleation. By means of microwave heating, the temperature can rise to approximately 574 °C in a few minutes. Results indicate that such temperature is a proper temperature for the synthesis of 2D g-C<sub>3</sub>N<sub>4</sub> nanosheets via some special thermal polycondensation reactions.
